# Supplementary material for: Evidence for a unitary structure of spatial cognition beyond general intelligence
Source: bioRxiv or medRxiv preprint supplement (doi:10.1101/693275), 2019-07-04
Supplement: Supplementary file [file media-1.pdf]

# Evidence for a unitary structure of spatial cognition beyond general intelligence

Margherita Malanchini, Kaili Rimfeld, Nicholas G. Shakeshaft, Andrew McMillan, Kerry L. Schofield, Maja Rodic, Valerio Rossi, Yulia Kovas, Philip S. Dale, Elliot M. Tucker-Drob, & Robert Plomin

## Supplementary Methods

Measures of general cognitive ability (g) over development

### List of Tables

**Table S1.** (a) Descriptive statistics for each spatial test and g, randomly selecting one twin out of each pair. (b) Descriptive statistics for the other half of the sample.

**Table S2.** Univariate Sex limitation models for individual tests of navigation included in the Spatial Spy battery

**Table S3.** Confirmatory factor analysis and model fit indices across the six tests of spatial orientation

**Table S4.** Common pathway model across the six tests of spatial orientation

**Table S5.** Comparative model fit indices for the phenotypic models including all 16 tests of spatial skills (6 tests of spatial orientation and 10 tests of object-based spatial skills).

**Table S6.** Hierarchical common pathway model examining the genetic and environmental factors characterizing variation in across the 16 tests of spatial abilities (6 tests of spatial orientation and 10 tests of object-based spatial skills).

### List of Figures

**Figure S1.** Two-factor model of spatial ability separating across the two spatial batteries administered at two different time points and following two different formats (online traditional psychometric assessment vs. virtual environment).

**Figure S2.** Two-factor model of spatial ability separating objects-based and orienting tests combining putatively separate categories of tests administered across the two batteries.

**Figure S3.** Cholesky decomposition exploring the genetic and environmental overlap between g and the hierarchical model of spatial ability factor

**Figure S4.** One-factor model of spatial ability including the 16 spatial tests accounting for  $g$  at the level of the indicator (each test).

**Figure S5.** Two-factor model of spatial ability separating the two batteries accounting for  $g$  at the level of the indicators (each test).

**Figure S6.** Two-factor model of spatial ability separating objects-based and orienting tests combining putatively different aspects of spatial skills across the two batteries accounting for  $g$  at the level of the indicators (each test).

**Figure S7.** Three-factor model of spatial ability separating objects-based, navigation and visualization tests across the two batteries accounting for  $g$ .

**Figure S8.** Hierarchical model including three first-order spatial factors (Navigation, Object-based and Visualization) and a second-order common factor of Spatial ability, accounting for  $g$  at the level of the indicators (each test).

**Figure S9.** Hierarchical model including three first-order spatial factors (Navigation, Object-based and Visualization) and a second-order common factor of Spatial ability, accounting for  $g$  at the level of the first-order factors.

**Figure S10.** Correlations between all spatial tests on the other half of the sample.

**Figure S11.** Factor structure of navigation abilities conducted examining the other half of the sample

**Figure S12.** Hierarchical model of spatial abilities conducted in the other half of the sample.

## Supplementary Methods

### *Measures of general cognitive ability (g) over development*

General cognitive ability ( *g* ; intelligence) was assessed in TEDS at ages 7, 9, 10, 12, 14, and 16. For the present analyses we created a longitudinal composite measure of *g* as a mean of these six assessments. At age 7, ‘*g*’ was calculated as a mean of conceptual grouping<sup>1</sup>, a WISC similarities test<sup>2</sup>, a WISC vocabulary test<sup>2</sup>, and a WISC picture completion test<sup>2</sup> all collected over telephone testing. At age 9, ‘*g*’ was calculated as a mean of a shapes test<sup>3</sup>, a WISC vocabulary test<sup>4</sup>, a WISC general knowledge task<sup>4</sup>, and a puzzle test<sup>3</sup> ; all tests were administered in booklets sent to the twins by post. At age 10, ‘*g*’ was calculated as a mean of the Ravens Standard Progressive Matrices<sup>5</sup>, a WISC vocabulary<sup>4</sup>, WISC picture completion<sup>2</sup>, and a WISC general knowledge test<sup>4</sup>; at age 10 and subsequent assessments, all ‘*g*’ data were obtained by internet testing. At age 12, ‘*g*’ was calculated as a mean of the Ravens Progressive Matrices<sup>5</sup>, a WISC picture completion<sup>2</sup>, a WISC vocabulary<sup>4</sup>, and a WISC general knowledge test<sup>4</sup>. At age 14, ‘*g*’ was calculated as a mean of the Raven’s Progressive Matrices<sup>5</sup> and a WISC vocabulary<sup>4</sup>. At age 16, ‘*g*’ was calculated as a mean of Mill Hill Vocabulary test<sup>6</sup> and Raven’s Progressive Matrices<sup>5</sup>.

## References

1. McCarthy, D. *McCarthy Scales of Children’s Abilities*. (New York: The Psychological Corporation., 1972).
2. Wechsler, D. *Wechsler Intelligence Scale for Children (3rd Ed. UK)*. (The Psychological Corporation, 1992).
3. Smith, P., Fernandes, C. & Strand, S. *Cognitive Abilities Test 3 (CAT3)*. (Windsor: nferNELSON., 2001).
4. Kaplan, E., Fein, D., Kramer, J., Delis, D. & Morris, R. *WISC-III As a Process Instrument (WISC-III-PI)*. (New York: The Psychological Corporation., 1999).
5. Raven, J., Raven, J. C. & Court, J. *Manual for Raven’s Progressive Matrices and Vocabulary Scales. Raven manual* (Oxford: Oxford University Press, 1996).
6. Raven, J. C., Raven, J. & Court, J. H. *The Mill Hill Vocabulary Scale. Manual for Raven’s progressive matrices and vocabulary scales* (Oxford:OPP, 1998).

## Tables

**Table S1.** (a) Descriptive statistics for each spatial test and g, randomly selecting one twin out of each pair. (b) Descriptive statistics for the other half of the sample.

(a)

|                                            | N    | mean  | sd    | min    | max   | range | skew   | kurtosis |
|--------------------------------------------|------|-------|-------|--------|-------|-------|--------|----------|
| Navigation directions<br>(cardinal points) | 1330 | 0.000 | 1.000 | -3.220 | 2.440 | 5.660 | -0.170 | -0.300   |
| Navigation landmarks                       | 1278 | 0.000 | 1.000 | -4.260 | 1.980 | 6.240 | -1.140 | 1.610    |
| Map reading                                | 1244 | 0.000 | 1.000 | -4.180 | 1.620 | 5.800 | -1.020 | 1.040    |
| Route memorizing                           | 1217 | 0.000 | 1.000 | -4.260 | 1.510 | 5.770 | -1.350 | 1.920    |
| Large-scale perspective taking             | 1285 | 0.000 | 1.000 | -3.350 | 1.470 | 4.830 | -0.960 | 0.400    |
| Large-scale scanning                       | 1229 | 0.000 | 1.000 | -4.160 | 1.590 | 5.750 | -1.430 | 2.120    |
| KC cross-section                           | 927  | 0.000 | 1.000 | -2.200 | 2.310 | 4.510 | -0.180 | -0.760   |
| KC 2d drawing                              | 920  | 0.000 | 1.000 | -3.480 | 1.540 | 5.020 | -0.710 | -0.020   |
| KC pattern assembly                        | 896  | 0.000 | 1.000 | -2.260 | 2.620 | 4.870 | -0.370 | -0.520   |
| KC Elithorne maze                          | 804  | 0.000 | 1.000 | -3.210 | 1.990 | 5.200 | -1.160 | 1.290    |
| KC mechanical reasoning                    | 914  | 0.000 | 1.000 | -3.060 | 2.940 | 6.000 | -0.180 | -0.050   |
| KC paper folding                           | 888  | 0.000 | 1.000 | -2.290 | 2.090 | 4.390 | -0.120 | -1.000   |
| KC 3d drawing                              | 833  | 0.000 | 1.000 | -2.030 | 2.340 | 4.370 | 0.030  | -1.000   |
| KC shapes rotation                         | 850  | 0.000 | 1.000 | -2.330 | 1.870 | 4.200 | -0.340 | -0.850   |
| KC small-scale perspective<br>taking       | 859  | 0.000 | 1.000 | -1.640 | 2.980 | 4.620 | 0.610  | -0.190   |
| KC mazes                                   | 850  | 0.000 | 1.000 | -3.070 | 2.650 | 5.720 | -0.140 | -0.120   |
| General cognitive ability (g)              | 1234 | 0.000 | 1.000 | -2.830 | 3.040 | 5.870 | 0.320  | 0.010    |

**Note:** all measures were standardized and residualized for age and sex within the randomly selected half of the sample by means of linear regression

(b) Descriptive statistics for the other half of the sample

|                                         | N    | mean  | sd    | min    | max   | range | skew   | kurtosis |
|-----------------------------------------|------|-------|-------|--------|-------|-------|--------|----------|
| Navigation directions (cardinal points) | 1349 | 0.000 | 1.000 | -3.250 | 2.790 | 6.050 | -0.110 | -0.330   |
| Navigation landmarks                    | 1312 | 0.000 | 1.000 | -4.330 | 2.070 | 6.400 | -0.900 | 0.870    |
| Map reading                             | 1268 | 0.000 | 1.000 | -4.300 | 1.620 | 5.930 | -1.000 | 1.160    |
| Route memorizing                        | 1234 | 0.000 | 1.000 | -4.500 | 1.550 | 6.050 | -1.250 | 1.710    |
| Large-scale perspective taking          | 1316 | 0.000 | 1.000 | -3.450 | 1.450 | 4.900 | -0.850 | 0.170    |
| Large-scale scanning                    | 1260 | 0.000 | 1.000 | -3.960 | 1.610 | 5.570 | -1.250 | 1.510    |
| KC cross-section                        | 939  | 0.000 | 1.000 | -2.250 | 2.330 | 4.580 | -0.260 | -0.710   |
| KC 2d drawing                           | 932  | 0.000 | 1.000 | -3.230 | 1.610 | 4.850 | -0.790 | 0.180    |
| KC pattern assembly                     | 911  | 0.000 | 1.000 | -2.420 | 2.130 | 4.550 | -0.440 | -0.580   |
| KC Elithorne maze                       | 815  | 0.000 | 1.000 | -3.850 | 1.940 | 5.790 | -1.060 | 1.280    |
| KC mechanical reasoning                 | 921  | 0.000 | 1.000 | -3.080 | 2.590 | 5.680 | -0.100 | -0.230   |
| KC paper folding                        | 893  | 0.000 | 1.000 | -2.380 | 1.900 | 4.280 | -0.270 | -0.960   |
| KC 3d drawing                           | 868  | 0.000 | 1.000 | -2.130 | 2.240 | 4.380 | -0.090 | -1.010   |
| KC shapes rotation                      | 857  | 0.000 | 1.000 | -2.450 | 1.920 | 4.370 | -0.420 | -0.760   |
| KC small-scale perspective taking       | 880  | 0.000 | 1.000 | -1.680 | 3.180 | 4.850 | 0.590  | -0.450   |
| KC mazes                                | 862  | 0.000 | 1.000 | -3.170 | 2.550 | 5.720 | -0.220 | -0.180   |
| General cognitive ability (g)           | 1242 | 0.000 | 1.000 | -2.770 | 2.950 | 5.720 | 0.150  | -0.150   |

**Note:** all measures were standardized and residualized for age and sex within the randomly selected half of the sample by means of linear regression

**Table S2.** Sex limitation model fitting sub-model comparisons (significant differences are marked in bold). FullHetACE=full genetic heterogeneity model, rG=Free; HetACE= quantitative heterogeneity model; cFullHetACE=full environmental heterogeneity model, rC=Free; HomACE= homogeneity model (no sex differences at all); ep=estimated parameters; minus2LL= minus 2 log-likelihood; df= degrees of freedom; AIC= Akaike information criterion; diffLL= change in log-likelihood; diffdf= change in degrees of freedom (significant differences are marked in bold).

| <b>Navigation ability</b>                     |    |         |      |         |        |        |      |
|-----------------------------------------------|----|---------|------|---------|--------|--------|------|
| <i>Qualitative genetic differences:</i>       |    |         |      |         |        |        |      |
|                                               | ep | -2LL    | df   | AIC     | diffLL | diffdf | p    |
| Model: FullHetACE                             | 9  | 5863.64 | 2121 | 1621.64 | -      | -      | -    |
| Model: HetACE                                 | 8  | 5863.64 | 2122 | 1619.64 | 0      | 1      | 0.96 |
| <i>Qualitative environmental differences:</i> |    |         |      |         |        |        |      |
|                                               | ep | -2LL    | df   | AIC     | diffLL | diffdf | p    |
| Model: cFullHetACE                            | 9  | 5870.66 | 2121 | 1628.66 | -      | -      | -    |
| Model: HetACE                                 | 8  | 5863.64 | 2122 | 1619.64 | -7.01  | 1      | 1    |
| <i>Quantitative differences:</i>              |    |         |      |         |        |        |      |
|                                               | ep | -2LL    | df   | AIC     | diffLL | diffdf | p    |
| Model: HetACE                                 | 8  | 5863.64 | 2122 | 1619.64 | -      | -      | -    |
| Model: HomACE                                 | 5  | 5874.35 | 2125 | 1624.35 | 10.71  | 3      | 0.01 |
| <b>Scanning</b>                               |    |         |      |         |        |        |      |
| <i>Qualitative genetic differences:</i>       |    |         |      |         |        |        |      |
|                                               | ep | -2LL    | df   | AIC     | diffLL | diffdf | p    |
| Model: FullHetACE                             | 9  | 6992.87 | 2480 | 2032.87 | -      | -      | -    |
| Model: HetACE                                 | 8  | 6992.87 | 2481 | 2030.87 | 0      | 1      | 1    |

*Qualitative environmental differences:*

|                    | ep | -2LL    | df   | AIC     | diffLL | diffdf | p |
|--------------------|----|---------|------|---------|--------|--------|---|
| Model: cFullHetACE | 9  | 7006.02 | 2480 | 2046.02 | -      | -      | - |
| Model: HetACE      | 8  | 6992.87 | 2481 | 2030.87 | -13.15 | 1      | 1 |

Quantitative differences:

|               | ep | -2LL    | df   | AIC     | diffLL | diffdf | p |
|---------------|----|---------|------|---------|--------|--------|---|
| Model: HetACE | 8  | 6992.87 | 2481 | 2030.87 | -      | -      | - |
| Model: HomACE | 5  | 7048.2  | 2484 | 2080.2  | 55.33  | 3      | 0 |

---

**Perspective taking**

---

*Qualitative genetic differences:*

|                   | ep | -2LL    | df   | AIC     | diffLL | diffdf | p    |
|-------------------|----|---------|------|---------|--------|--------|------|
| Model: FullHetACE | 9  | 7314.24 | 2592 | 2130.24 | -      | -      | -    |
| Model: HetACE     | 8  | 7314.77 | 2593 | 2128.77 | 0.53   | 1      | 0.47 |

*Qualitative environmental differences:*

|                    | ep | -2LL    | df   | AIC     | diffLL | diffdf | p |
|--------------------|----|---------|------|---------|--------|--------|---|
| Model: cFullHetACE | 9  | 7336    | 2592 | 2152    | -      | -      | - |
| Model: HetACE      | 8  | 7314.77 | 2593 | 2128.77 | -21.23 | 1      | 1 |

Quantitative differences:

|               | ep | -2LL    | df   | AIC     | diffLL | diffdf | p |
|---------------|----|---------|------|---------|--------|--------|---|
| Model: HetACE | 8  | 7314.77 | 2593 | 2128.77 | -      | -      | - |
| Model: HomACE | 5  | 7328.79 | 2596 | 2136.79 | 14.02  | 3      | 0 |

---

#### Navigation according to landmarks

---

##### *Qualitative genetic differences:*

|                   | ep | -2LL    | df   | AIC     | diffLL | diffdf | p |
|-------------------|----|---------|------|---------|--------|--------|---|
| Model: FullHetACE | 9  | 7216.09 | 2581 | 2054.09 | -      | -      | - |
| Model: HetACE     | 8  | 7216.09 | 2582 | 2052.09 | 0      | 1      | 1 |

##### *Qualitative environmental differences:*

|                    | ep | -2LL    | df   | AIC     | diffLL | diffdf | p |
|--------------------|----|---------|------|---------|--------|--------|---|
| Model: cFullHetACE | 9  | 7216.09 | 2581 | 2054.09 | -      | -      | - |
| Model: HetACE      | 8  | 7216.09 | 2582 | 2052.09 | 0      | 1      | 1 |

##### *Quantitative differences:*

|               | ep | -2LL    | df   | AIC     | diffLL | diffdf | p |
|---------------|----|---------|------|---------|--------|--------|---|
| Model: HetACE | 8  | 7216.09 | 2582 | 2052.09 | -      | -      | - |
| Model: HomACE | 5  | 7248.5  | 2585 | 2078.5  | 32.42  | 3      | 0 |

---

#### Navigation according to directions

---

##### *Qualitative genetic differences:*

|                   | ep | -2LL    | df   | AIC     | diffLL | diffdf | p    |
|-------------------|----|---------|------|---------|--------|--------|------|
| Model: FullHetACE | 9  | 7390.91 | 2670 | 2050.91 | -      | -      | -    |
| Model: HetACE     | 8  | 7392.27 | 2671 | 2050.27 | 1.36   | 1      | 0.24 |



*Qualitative environmental differences:*

|                    | ep | -2LL    | df   | AIC     | diffLL | diffdf | p    |
|--------------------|----|---------|------|---------|--------|--------|------|
| Model: cFullHetACE | 9  | 7390.91 | 2670 | 2050.91 | -      | -      | -    |
| Model: HetACE      | 8  | 7392.27 | 2671 | 2050.27 | 1.36   | 1      | 0.24 |

Quantitative differences:

|               | ep | -2LL    | df   | AIC     | diffLL | diffdf | p    |
|---------------|----|---------|------|---------|--------|--------|------|
| Model: HetACE | 8  | 7392.27 | 2671 | 2050.27 | -      | -      | -    |
| Model: HomACE | 5  | 7398.39 | 2674 | 2050.39 | 6.12   | 3      | 0.11 |

---

**Map reading**

---

*Qualitative genetic differences:*

|                   | ep | -2LL    | df   | AIC     | diffLL | diffdf | p    |
|-------------------|----|---------|------|---------|--------|--------|------|
| Model: FullHetACE | 9  | 6980.65 | 2503 | 1974.65 | -      | -      | -    |
| Model: HetACE     | 8  | 6983.5  | 2504 | 1975.5  | 2.85   | 1      | 0.09 |

*Qualitative environmental differences:*

|                    | ep | -2LL   | df   | AIC    | diffLL | diffdf | p |
|--------------------|----|--------|------|--------|--------|--------|---|
| Model: cFullHetACE | 9  | 6983.5 | 2503 | 1977.5 | -      | -      | - |
| Model: HetACE      | 8  | 6983.5 | 2504 | 1975.5 | 0      | 1      | 1 |

Quantitative differences:

|               | ep | -2LL    | df   | AIC     | diffLL | diffdf | p |
|---------------|----|---------|------|---------|--------|--------|---|
| Model: HetACE | 8  | 6983.5  | 2504 | 1975.5  | -      | -      | - |
| Model: HomACE | 5  | 7079.69 | 2507 | 2065.69 | 96.19  | 3      | 0 |

---

### Route memorizing

---

#### *Qualitative genetic differences:*

|                   | ep | -2LL    | df   | AIC     | diffLL | diffdf | p |
|-------------------|----|---------|------|---------|--------|--------|---|
| Model: FullHetACE | 9  | 6769.48 | 2442 | 1885.48 | -      | -      | - |
| Model: HetACE     | 8  | 6769.48 | 2443 | 1883.48 | 0      | 1      | 1 |

#### *Qualitative environmental differences:*

|                    | ep | -2LL    | df   | AIC     | diffLL | diffdf | p |
|--------------------|----|---------|------|---------|--------|--------|---|
| Model: cFullHetACE | 9  | 6769.48 | 2442 | 1885.48 | -      | -      | - |
| Model: HetACE      | 8  | 6769.48 | 2443 | 1883.48 | 0      | 1      | 1 |

#### Quantitative differences:

|               | ep | -2LL    | df   | AIC     | diffLL | diffdf | p |
|---------------|----|---------|------|---------|--------|--------|---|
| Model: HetACE | 8  | 6769.48 | 2443 | 1883.48 | -      | -      | - |
| Model: HomACE | 5  | 6894.1  | 2446 | 2002.1  | 124.63 | 3      | 0 |

---

**Table S3.** Confirmatory factor analysis and model fit indices across the six tests of spatial orientation.

| <b>Spatial orientation battery</b>                                                                           | <b>Factor loadings</b> | <b>S.E.</b> |
|--------------------------------------------------------------------------------------------------------------|------------------------|-------------|
| Navigation directions (cardinal points)                                                                      | 0.736                  | 0.017       |
| Navigation landmarks                                                                                         | 0.756                  | 0.017       |
| Map reading                                                                                                  | 0.682                  | 0.019       |
| Route memorizing                                                                                             | 0.636                  | 0.021       |
| Large-scale perspective taking                                                                               | 0.582                  | 0.022       |
| Large-scale scanning                                                                                         | 0.566                  | 0.024       |
| Model fit indices: $\chi^2 = 69.051(9)$ , $p < .00005$ , CFI = 0.972 TLI = 0.953, RMSEA = 0.071 SRMR. =0.026 |                        |             |

**Table S4.** Common pathway model examining the common and specific genetic (A), shared-environmental (C) and nonshared environmental variance (E) across the six tests of spatial orientation and model fit indices.

| Variance specific to each test                                                                                                      |                       |                        |                      | Percentages of A, C and E variance in each test captured by the common Navigation factor |      |     |
|-------------------------------------------------------------------------------------------------------------------------------------|-----------------------|------------------------|----------------------|------------------------------------------------------------------------------------------|------|-----|
| Measure                                                                                                                             | A                     | C                      | E                    | A                                                                                        | C    | E   |
| Navigation directions                                                                                                               | 0.181 (0.136; 0.233)  | 0.001 (-0.000; 0.001)  | 0.274 (0.228; 0.324) | 66%                                                                                      | 100% | 36% |
| Navigation landmarks                                                                                                                | 0.000 (-0.001, 0.001) | 0.038 (0.006; 0.096)   | 0.394 (0.340; 0.451) | 88%                                                                                      | 53%  | 28% |
| Map reading                                                                                                                         | 0.035 (0.000; 0.130)  | 0.000 (-0.000; 0.000)  | 0.506 (0.431; 0.586) | 88%                                                                                      | 100% | 20% |
| Route memorizing                                                                                                                    | 0.058 (0.005; 0.167)  | 0.001 (-0.078; 0.099)  | 0.564 (0.478; 0.654) | 80%                                                                                      | 100% | 16% |
| Large-scale Scanning                                                                                                                | 0.000 (-0.001; 0.002) | -0.000 (-0.000; 0.000) | 0.705 (0.664; 0.748) | 100%                                                                                     | 100% | 10% |
| Large-scale Perspective-taking                                                                                                      | 0.047 (0.003; 0.139)  | 0.000 (0.000; 0.000)   | 0.597(0.524; 0.675)  | 82%                                                                                      | 100% | 15% |
| Variance common across all tests                                                                                                    |                       |                        |                      |                                                                                          |      |     |
| Navigation latent factor                                                                                                            | 0.634 (0.410; 0.912)  | 0.083 (-0.005; 0.430)  | 0.278 (0.206; 0.362) |                                                                                          |      |     |
| Model fit indices: AIC = 39177.976; $\chi^2 = 269.937$ (148), $p = 0.0000$ ; CFI = 0.968; TLI = 0.971; RMSEA = 0.030 ; SRMR = 0.049 |                       |                        |                      |                                                                                          |      |     |

**Note.** All paths are standardized and squared, numbers in parentheses are 95% confidence intervals around the estimates.

**Table S5.** Comparative model fit indices for the phenotypic models including all 16 tests of spatial skills (6 tests of spatial orientation and 10 tests of object-based spatial skills)

|   | Model                                                                                                         | CFI   | TLI   | RMSEA | Chi^2                     | SRMR  | Correlations between latent factors                           |
|---|---------------------------------------------------------------------------------------------------------------|-------|-------|-------|---------------------------|-------|---------------------------------------------------------------|
| a | 1 Factor                                                                                                      | 0.890 | 0.873 | 0.061 | 692.730 (104), $p < .001$ | 0.059 | -                                                             |
| b | 1 Factor <i>accounting for <math>g^I</math></i>                                                               | 0.894 | 0.862 | 0.067 | 609.795 (104), $p < .001$ | 0.053 | -                                                             |
| c | 2 Factors (Spatial Spy battery and. King's Challenge battery)                                                 | 0.958 | 0.951 | 0.037 | 316.000 (103), $p < .001$ | 0.040 | .741                                                          |
| d | 2 Factors (Spatial Spy battery and. King's Challenge battery) <i>accounting for <math>g^I</math></i>          | 0.961 | 0.949 | 0.041 | 288.468 (103), $p < .001$ | 0.038 | .659                                                          |
| e | 2 Factors (Object Manipulation and Spatial Orientation)                                                       | 0.920 | 0.907 | 0.053 | 529.390 (103), $p < .001$ | 0.054 | .847                                                          |
| f | 2 Factors (Object Manipulation and Spatial Orientation) <i>accounting for <math>g^I</math></i>                | 0.925 | 0.901 | 0.057 | 461.763 (103), $p < .001$ | 0.051 | .775                                                          |
| g | 3 Factors (Object Manipulation Navigation and Visualization)                                                  | 0.953 | 0.944 | 0.041 | 351.870 (101), $p < .001$ | 0.041 | Obj with Or = .726<br>Or with Sc = .948<br>Sc with Obj = .858 |
| h | 3 Factors (Object Manipulation Navigation and Visualization) <i>accounting for <math>g^I</math></i>           | 0.957 | 0.942 | 0.043 | 306.307 (101), $p < .001$ | 0.038 | Obj with Or = .633<br>Or with Sc = .949<br>Sc with Obj = .806 |
| i | 3 Factors (Object Manipulation Navigation and Visualization) and a second order common Spatial Ability factor | 0.953 | 0.944 | 0.041 | 351.870 (101), $p < .001$ | 0.041 |                                                               |

|   |                                                                                                                                                   |       |       |       |                         |       |   |
|---|---------------------------------------------------------------------------------------------------------------------------------------------------|-------|-------|-------|-------------------------|-------|---|
| j | 3 Factors (Object Manipulation Navigation and Visualization) and a second order common Spatial Ability factor <i>accounting for g<sup>1</sup></i> | 0.957 | 0.942 | 0.043 | 306.307 (101), p < .001 | 0.038 | - |
| k | 3 Factors (Object Manipulation Navigation and Visualization) and a second order common Spatial Ability factor <i>accounting for g<sup>2</sup></i> | 0.951 | 0.941 | 0.044 | 348.789 (114), p < .001 | 0.041 | - |

---

<sup>1</sup> = g included in the model at the level of the indicators; <sup>2</sup> = g included in the model at the level of the first order latent factors. Models h and j and models i and k represent two different ways of specifying the same model, therefore their model fit indices are identical.

**Table S6.** Genetic and environmental variance components for the hierarchical model of spatial abilities

| Measure                                         | Variance specific to each test |                      | Loading<br>on first order factor | A and E variance captured by<br>the first order factors but not shared<br>with the general spatial ability<br>factor |       |
|-------------------------------------------------|--------------------------------|----------------------|----------------------------------|----------------------------------------------------------------------------------------------------------------------|-------|
|                                                 | A                              | E                    |                                  | A                                                                                                                    | E     |
| Navigation from directions<br>(cardinal points) | 0.136 (0.094; 0.186)           | 0.255 (0.214; 0.309) | 0.777 (0.755; 0.799)             | 0.030                                                                                                                | 0.048 |
| Navigation from landmarks                       | 0.072 (0.025; 0.145)           | 0.419 (0.356; 0.487) | 0.712 (0.685; 0.740)             | 0.025                                                                                                                | 0.041 |
| Map reading                                     | 0.016; (-0.016;<br>0.133)      | 0.511 (0.438; 0.588) | 0.687 (0.658; 0.717)             | 0.023                                                                                                                | 0.036 |
| Route memorizing                                | 0.059 (0.007; 0.160)           | 0.565 (0.483; 0.654) | 0.612 (0.577; 0.647)             | 0.018                                                                                                                | 0.029 |
| Cross-sections                                  | 0.075 (0.024; 0.155)           | 0.556 (0.491; 0.625) | 0.606 (0.573; 0.639)             | 0.100                                                                                                                | 0.029 |
| 2D drawing                                      | 0.010 (-0.046; 0.173)          | 0.470 (0.398; 0.549) | 0.721 (0.694; 0.748)             | 0.139                                                                                                                | 0.041 |
| Pattern assembly                                | 0.028 (-0.000; 0.128)          | 0.527 (0.456; 0.602) | 0.666 (0.637; 0.696)             | 0.100                                                                                                                | 0.029 |
| Shapes rotation                                 | 0.051 (0.009; 0.125)           | 0.476 (0.412; 0.543) | 0.688 (0.658; 0.718)             | 0.128                                                                                                                | 0.036 |
| Mechanical reasoning                            | 0.150 (0.093; 0.221)           | 0.473 (0.405; 0.546) | 0.614; (0.579; 0.648)            | 0.100                                                                                                                | 0.029 |
| Paper folding                                   | 0.107 (0.059; 0.169)           | 0.366 (0.302; 0.429) | 0.726 (0.698; 0.754)             | 0.143                                                                                                                | 0.042 |
| 3D drawing                                      | 0.093 (0.046; 0.155)           | 0.303 (0.250; 0.362) | 0.777 (0.752; 0.801)             | 0.160                                                                                                                | 0.047 |
| Small-scale perspective taking                  | 0.154 (0.081; 0.250)           | 0.602 (0.512; 0.697) | 0.494 (0.453; 0.535)             | 0.000                                                                                                                | 0.000 |
| Large-scale scanning                            | 0.000 (-0.001; 0.002)          | 0.741 (0.698; 0.783) | 0.509 (0.468; 0.550)             | 0.000                                                                                                                | 0.000 |

|                                                                                                                                       |                       |                      |                                       |                                                                        |       |
|---------------------------------------------------------------------------------------------------------------------------------------|-----------------------|----------------------|---------------------------------------|------------------------------------------------------------------------|-------|
| Large-scale perspective-taking                                                                                                        | 0.024 (-0.000; 0.136) | 0.608 (0.538; 0.688) | 0.604 (0.571; 0.636)                  | 0.000                                                                  | 0.000 |
| Elithorne Mazes                                                                                                                       | 0.176 (0.096; 0.284)  | 0.532 (0.438; 0.636) | 0.537 (0.486; 0.604)                  | 0.000                                                                  | 0.000 |
| Mazes                                                                                                                                 | 0.134 (0.067; 0.223)  | 0.577 (0.497; 0.664) | 0.537 (0.495; 0.579)                  | 0.000                                                                  | 0.000 |
| Variance captured by the first order factors                                                                                          |                       |                      | <b>Loading on second order factor</b> | <b>A and E variance captured by the general spatial ability factor</b> |       |
| Navigation latent factor                                                                                                              | 0.051 (0.011; 0.122)  | 0.085 (0.041; 0.145) | 0.929 (0.904; 0.954)                  | 0.726                                                                  | 0.138 |
| Object-based latent factor                                                                                                            | 0.265 (0.198; 0.339)  | 0.075 (0.028; 0.145) | 0.812 (0.776; 0.848)                  | 0.551                                                                  | 0.104 |
| Visualization latent factor                                                                                                           | 0.000 (0.000; 0.000)  | 0.000 (0.000; 0.000) | 1.00 (1.00; 1.000)                    | 0.837                                                                  | 0.163 |
| <b>Variance common to all tests captured by the second order Spatial Ability factor</b>                                               |                       |                      |                                       |                                                                        |       |
| <b>Common factor of Spatial ability</b>                                                                                               | 0.837 (0.779; 0.894)  | 0.163 (0.110; 0.225) | -                                     | -                                                                      | -     |
| Model fit indices: AIC = 82828.772; $\chi^2 = 1681.128$ (1040), $p = 0.0000$ ; CFI = 0.941; TLI = 0.944; RMSEA = 0.026 ; SRMR = 0.056 |                       |                      |                                       |                                                                        |       |



## Figures

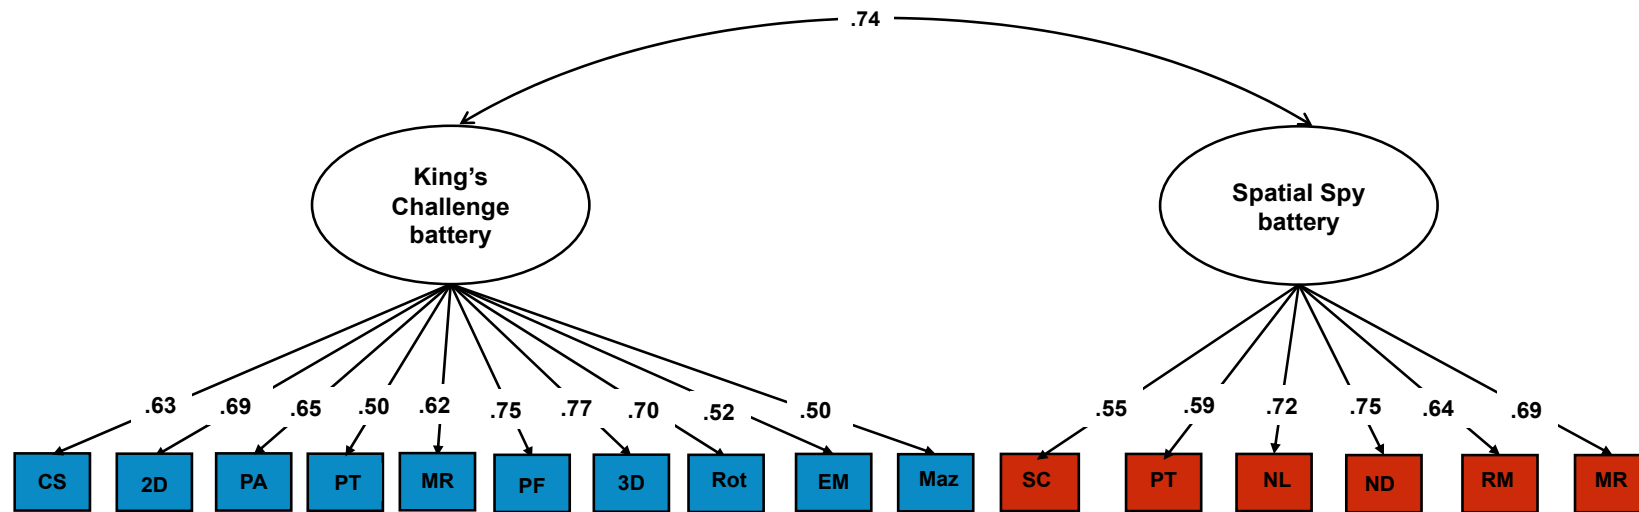

**Figure S1.** Two-factor model of spatial ability separating across the two spatial batteries administered at two different time points and following two different formats (online traditional psychometric assessment – The King’s Challenge battery – vs. virtual environment – The Spatial Spy battery). ND = navigation based on directions, NL = navigation based on landmarks, MR = map reading, RM = route memory, PT = perspective taking, SC = scanning, CS = cross-section, 2d = 2d drawing, PA = pattern assembly, EM = Elithorn Mazes, MR = Mechanical Reasoning, PF = paper folding, 3d = 3d drawing, Rot = mental rotation, PT = perspective taking, Maz = mazes; Model fit indices are reported in Table S5.

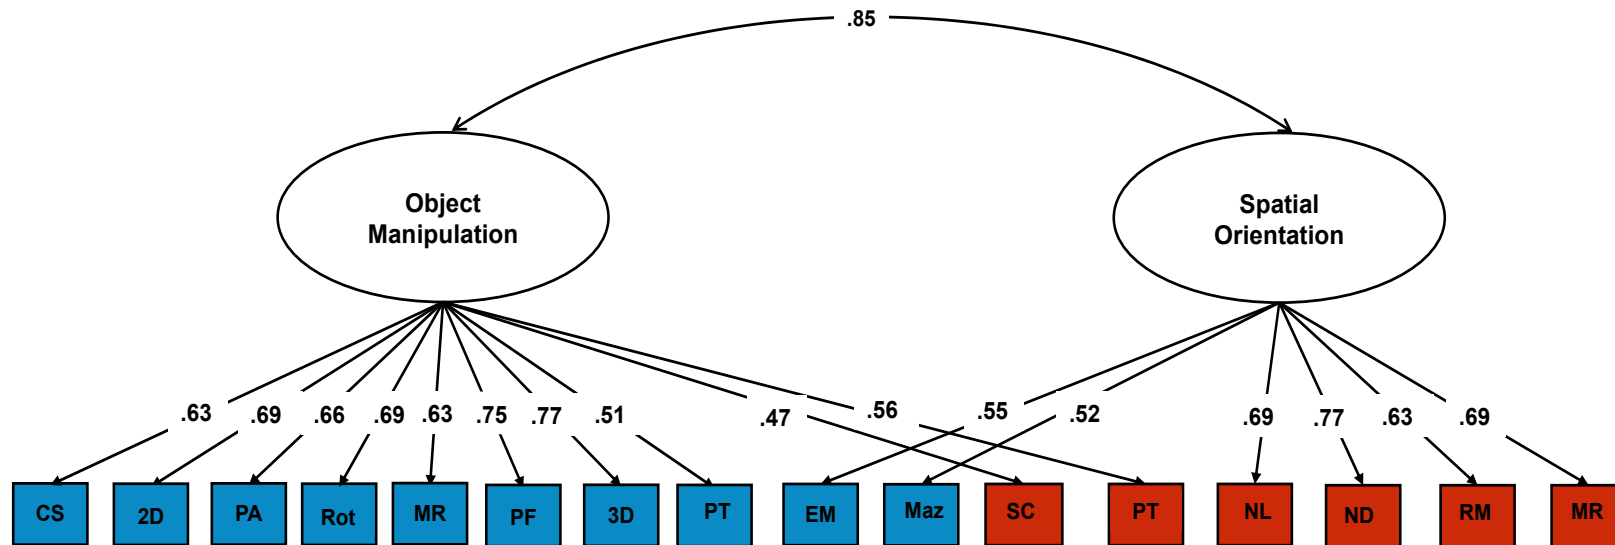

**Figure S2.** Two-factor model of spatial ability separating objects-based and orienting tests combining putatively separate categories of tests administered across the two batteries. ND = navigation based on directions, NL = navigation based on landmarks, MR = map reading, RM = route memory, PT = perspective taking, SC = scanning, CS = cross-sections, 2d = 2d drawing, PA = pattern assembly, EM = Elithorn Mazes, MR = Mechanical Reasoning, PF = paper folding, 3d = 3d drawing, Rot = mental rotation, PT = perspective taking, Maz = mazes; Model fit indices are reported in Table S5.

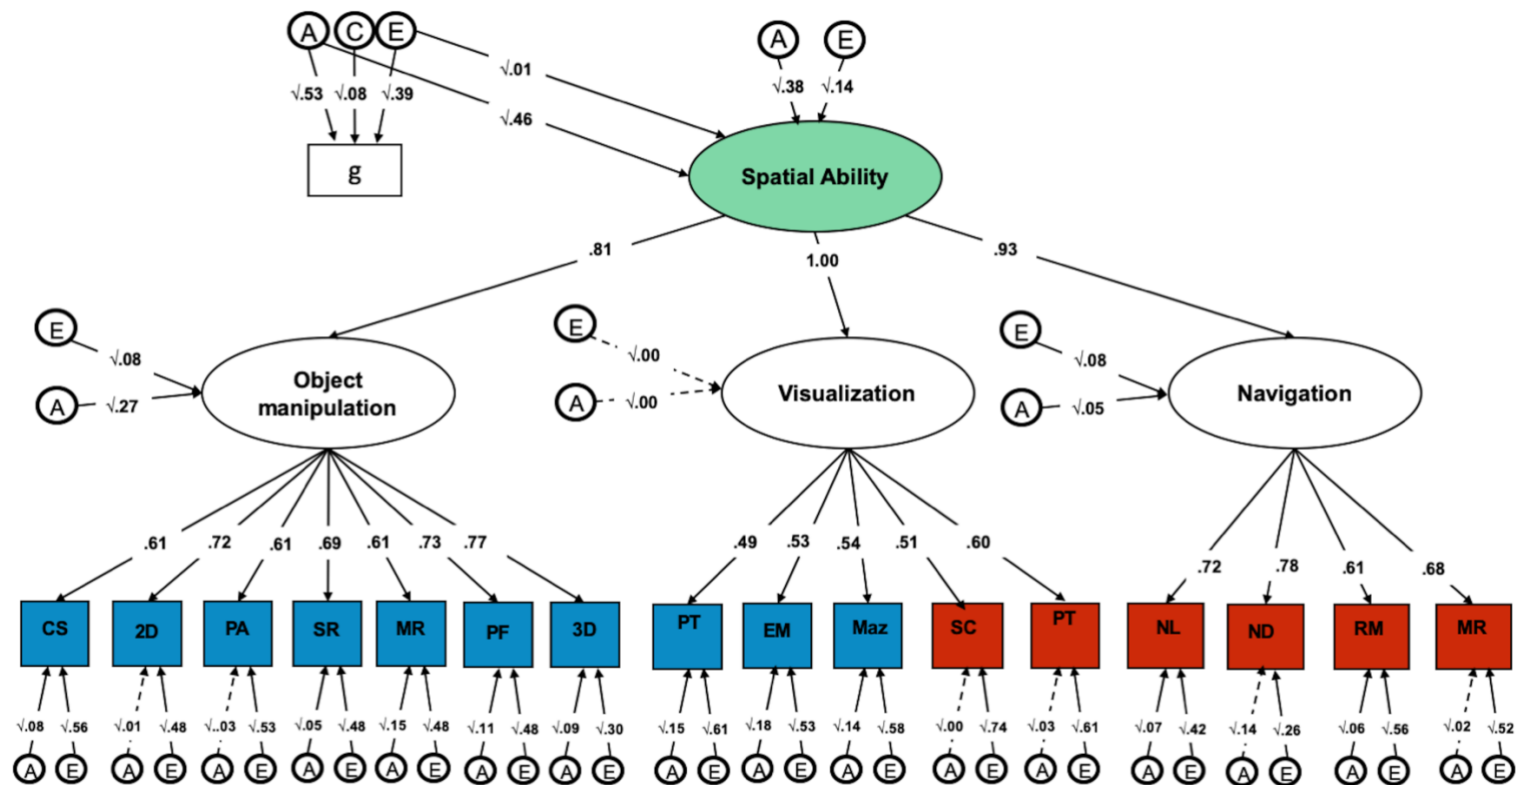

**Figure S3.** Hierarchical common pathway model exploring the genetic and environmental association between *g* and the common spatial ability factor. ND = navigation based on directions, NL = navigation based on landmarks, MR = map reading, RM = route memory, PT = perspective taking, SC = scanning, CS = cross-sections, 2d = 2d drawing, PA = pattern assembly, EM = Elithorn Mazes, MR = Mechanical Reasoning, PF = paper folding, 3d = 3d drawing, Rot = mental rotation, PT = perspective taking, Maz = mazes, *g* = general cognitive ability; Model fit indices are reported in Table S5.

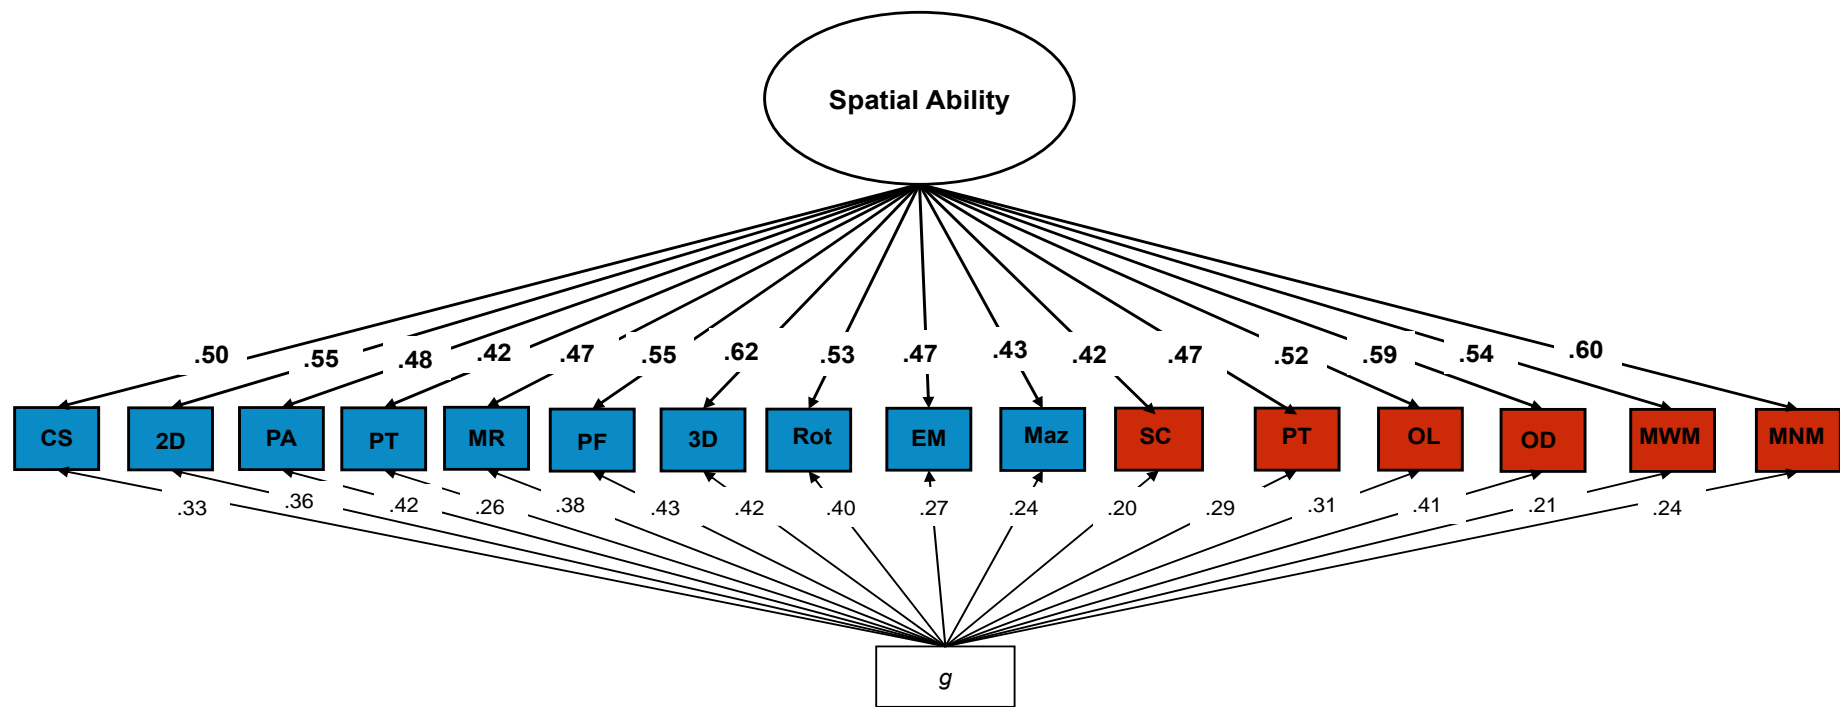

**Figure S4.** One-factor model of spatial ability including the 16 spatial tests accounting for  $g$  at the level of the indicator (each test); see Table S5 for model fit indices. ND = navigation based on directions, NL = navigation based on landmarks, MR = map reading, RM = route memory, PT = perspective taking, SC = scanning, CS = cross-sections, 2d = 2d drawing, PA = pattern assembly, EM = Elithorn Mazes, MR = Mechanical Reasoning, PF = paper folding, 3d = 3d drawing, Rot = mental rotation, PT = perspective taking, Maz = mazes,  $g$  = general cognitive ability.

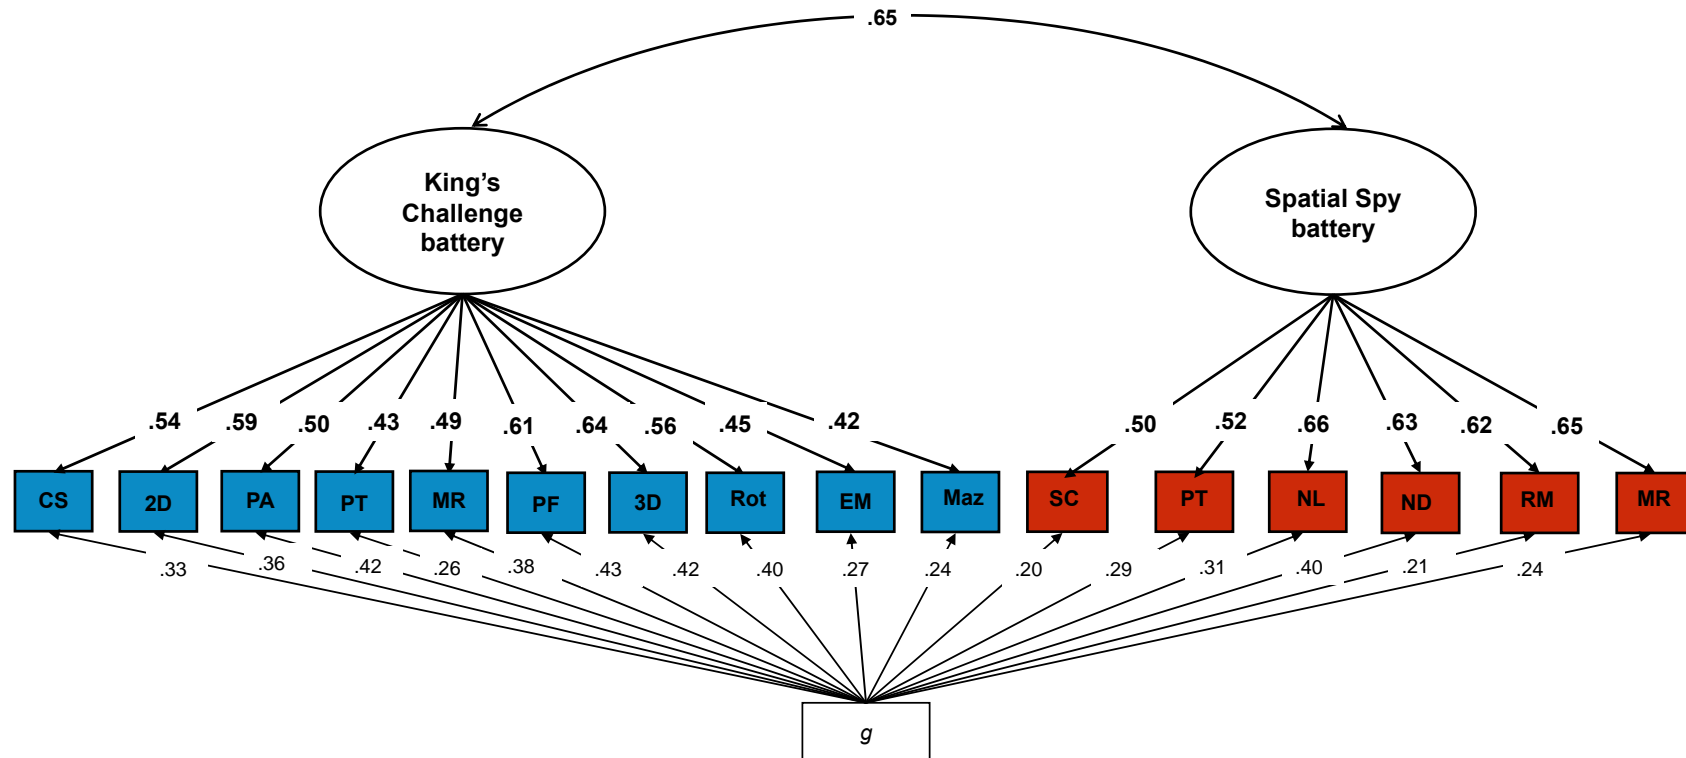

**Figure S5.** Two-factor model of spatial ability separating the two batteries accounting for *g* at the level of the indicators (each test). Model fit indices are reported in Table S5. ND = navigation based on directions, NL = navigation based on landmarks, MR = map reading, RM = route memory, PT = perspective taking, SC = scanning, CS = cross-section, 2d = 2d drawing, PA = pattern assembly, EM = Elithorn Mazes, MR = Mechanical Reasoning, PF = paper folding, 3d = 3d drawing, Rot = mental rotation, PT = perspective taking, Maz = mazes, *g* = general cognitive ability.

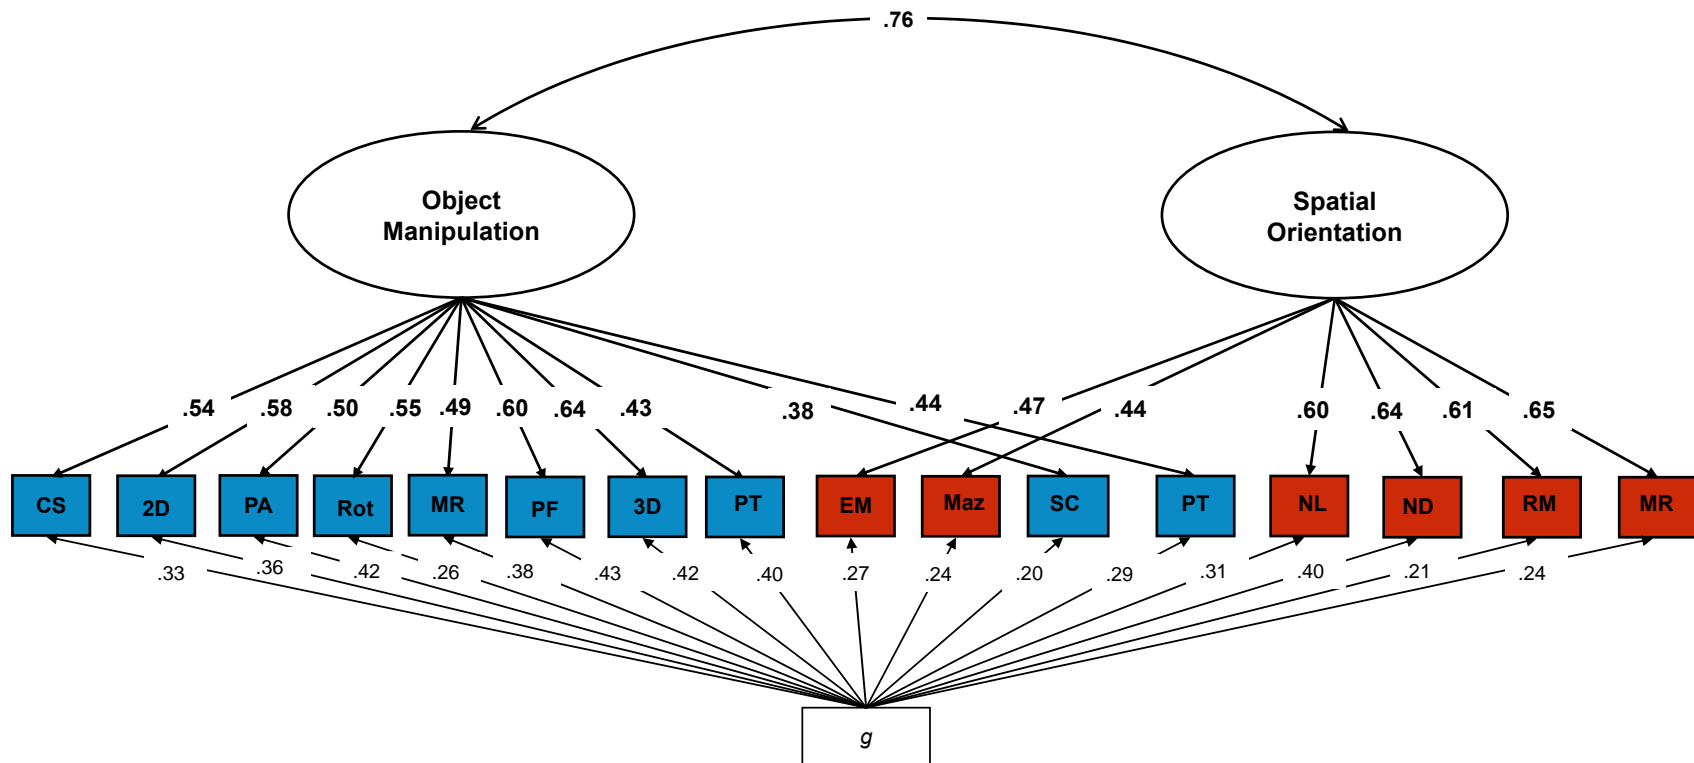

**Figure S6.** Two-factor model of spatial ability separating objects-based and orienting tests combining putatively different aspects of spatial skills across the two batteries accounting for *g* at the level of the indicators (each test). Model fit indices are reported in Table S5. ND = navigation based on directions, NL = navigation based on landmarks, MR = map reading, RM = route memory, PT = perspective taking, SC = scanning, CS = cross-sections, 2d = 2d drawing, PA = pattern assembly, EM = Elithorn Mazes, MR = Mechanical Reasoning, PF = paper folding, 3d = 3d drawing, Rot = mental rotation, PT = perspective taking, Maz = mazes, *g* = general cognitive ability.

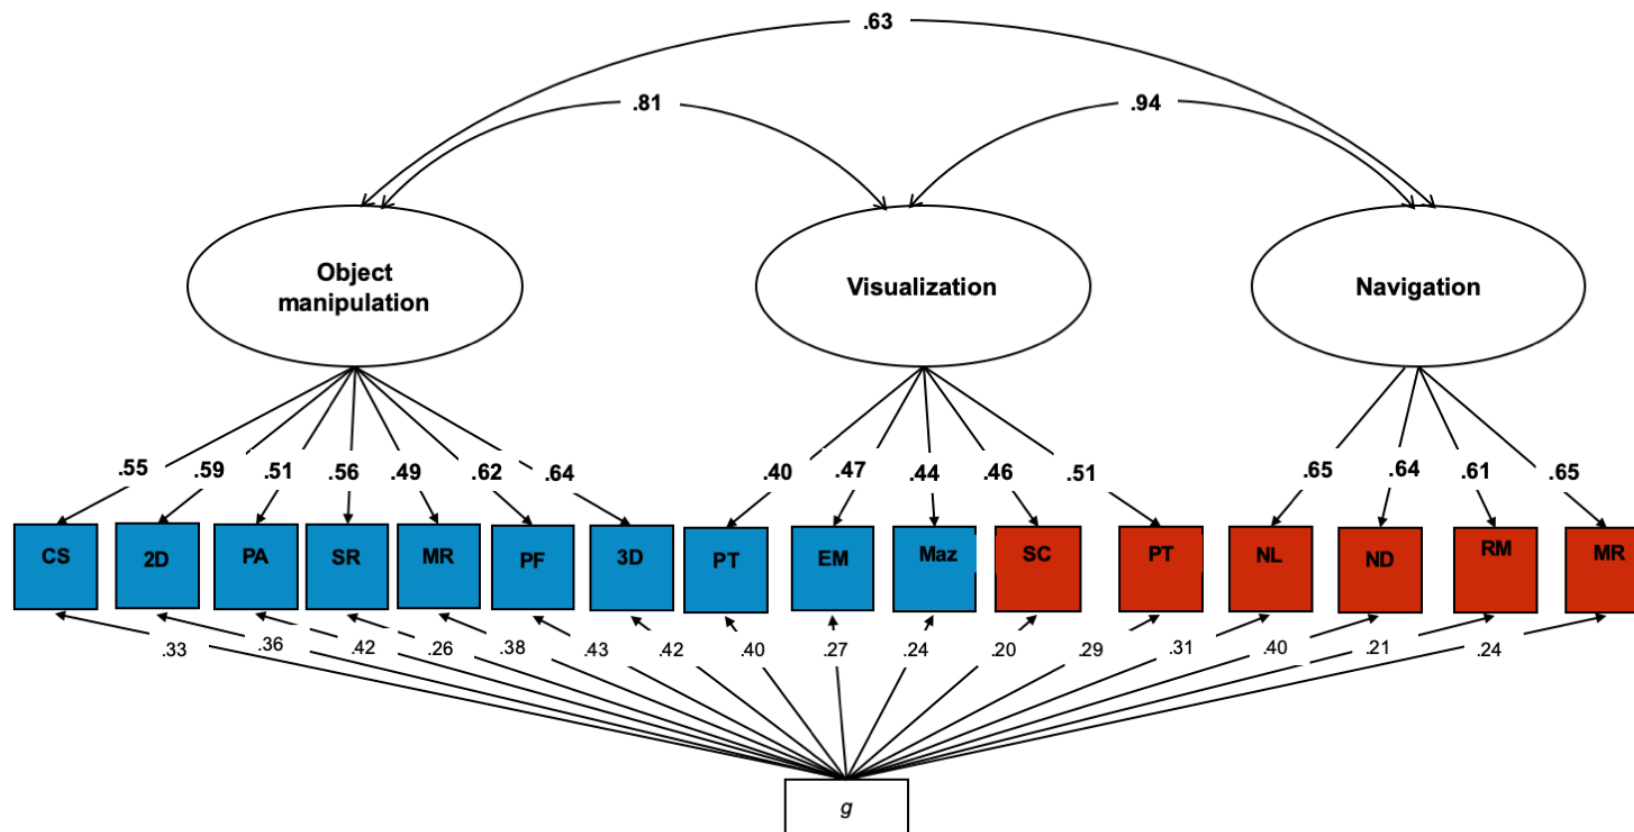

**Figure S7.** Three-factor model of spatial ability separating objects-based, navigation and visualization tests across the two batteries accounting for *g*. Model fit indices are reported in Table S5. ND = navigation based on directions, NL = navigation based on landmarks, MR = map reading, RM = route memory, PT = perspective taking, SC = scanning, CS = cross-sections, 2d = 2d drawing, PA = pattern assembly, EM = Elithorn Mazes, MR = Mechanical Reasoning, PF = paper folding, 3d = 3d drawing, Rot = mental rotation, PT = perspective taking, Maz = mazes, *g* = general cognitive ability.

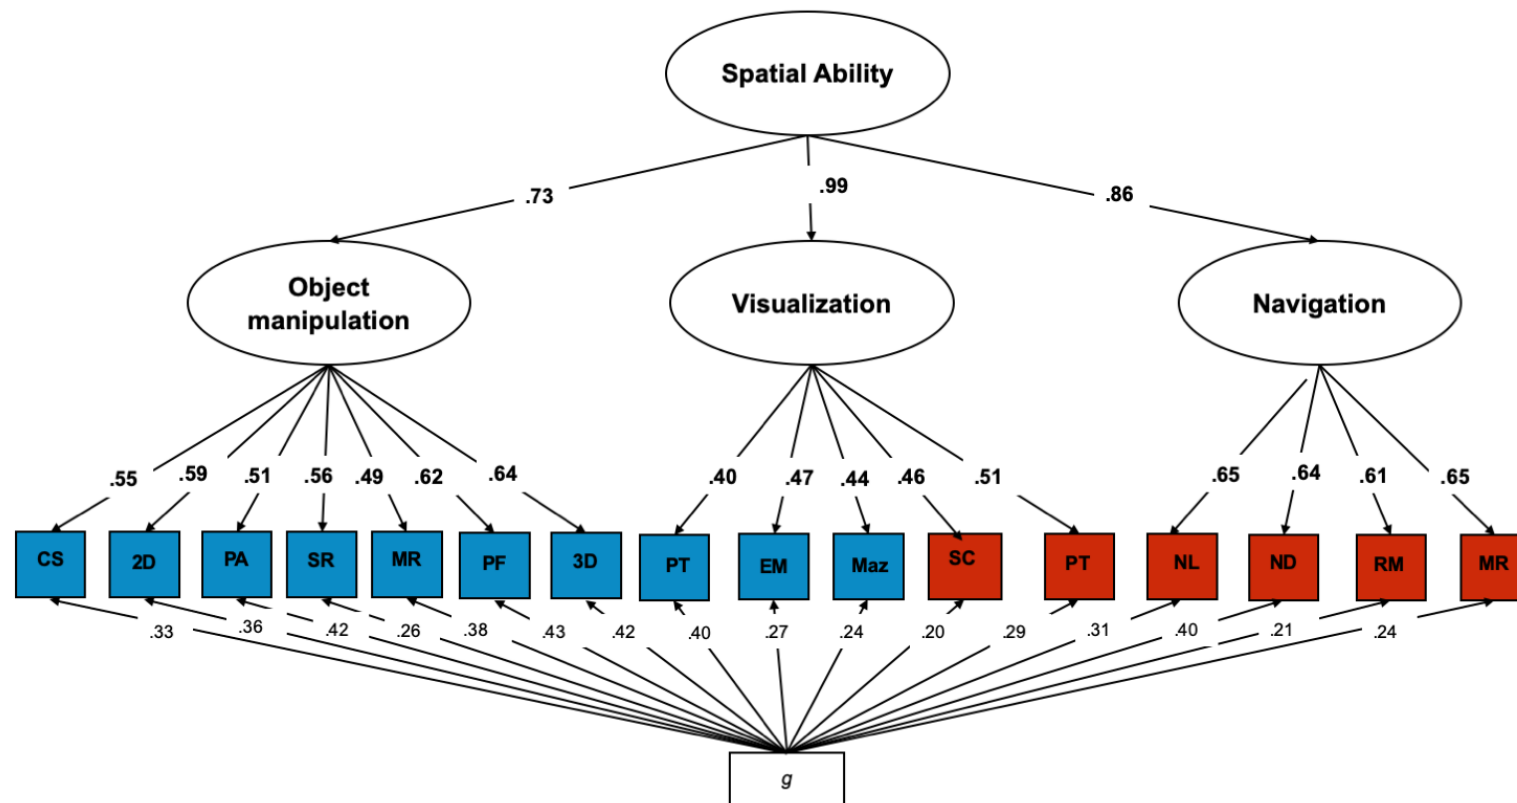

**Figure S8.** Hierarchical model including three first-order spatial factors (Navigation, Object-based and Visualization) and a second-order common factor of Spatial ability, accounting for  $g$  at the level of the indicators (each test). Model fit indices are reported in Table S5. ND = navigation based on directions, NL = navigation based on landmarks, MR = map reading, RM = route memory, PT = perspective taking, SC = scanning, CS = cross-sections, 2d = 2d drawing, PA = pattern assembly, EM = Elithorn Mazes, MR = Mechanical Reasoning, PF = paper folding, 3d = 3d drawing, Rot = mental rotation, PT = perspective taking, Maz = mazes,  $g$  = general cognitive ability.



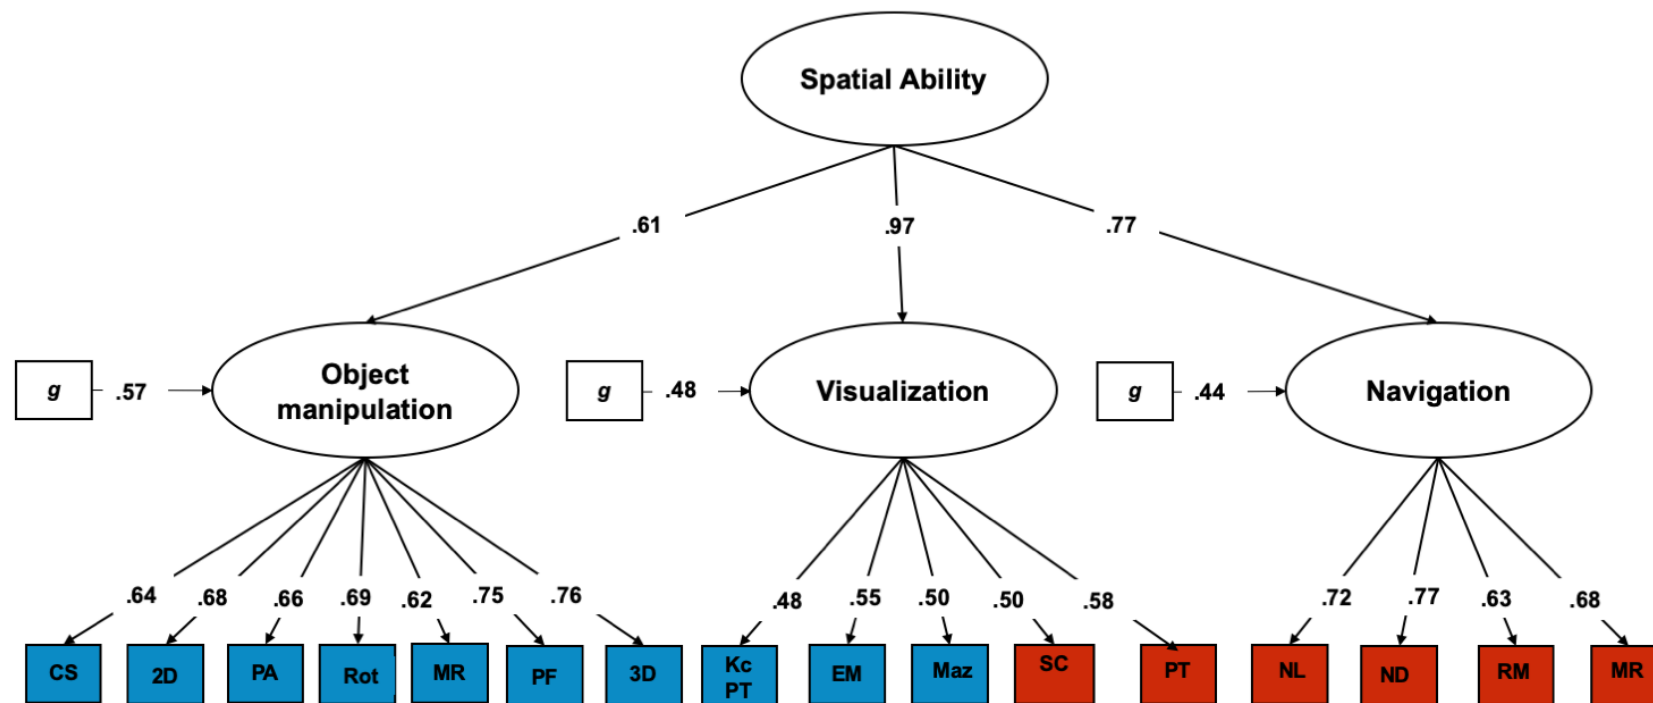

**Figure S9.** Hierarchical model including three first-order spatial factors (Navigation, Object-based and Visualization) and a second-order common factor of Spatial ability, accounting for *g* at the level of the first-order factors. Model fit indices are reported in Table S5. ND = navigation based on directions, NL = navigation based on landmarks, MR = map reading, RM = route memory, PT = perspective taking, SC = scanning, CS = cross-sections, 2d = 2d drawing, PA = pattern assembly, EM = Elithorn Mazes, MR = Mechanical Reasoning, PF = paper folding, 3d = 3d drawing, Rot = mental rotation, PT = perspective taking, Maz = mazes, *g* = general cognitive ability.

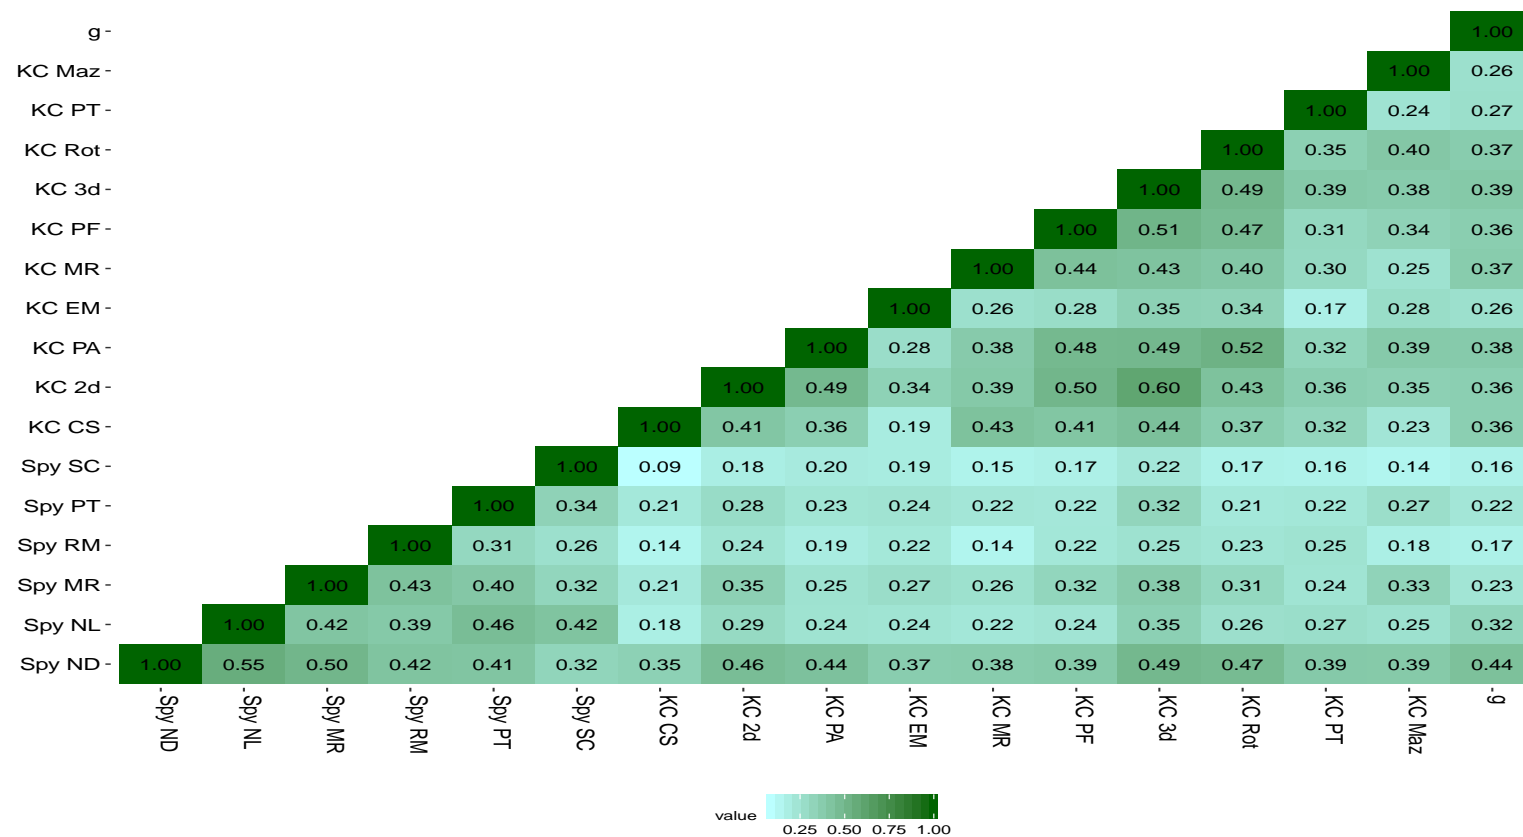

**Figure S10.** Correlations between all spatial tests and general cognitive ability using data from the other half of the phenotypic sample. Spy = Spatial Spy battery (large-scale), KC = King's Challenge battery (small-scale), ND = navigation based on directions, NL = navigation based on landmarks, MR = map reading, RM = route memory, PT = perspective taking, SC = scanning, CS = cross-sections, 2d = 2d drawing, PA = pattern assembly, EM = Elithorn Mazes, MR = Mechanical Reasoning, PF = paper folding, 3d = 3d drawing, Rot = mental rotation, PT = perspective taking, Maz = mazes, g = general cognitive ability. All correlations were significant at the  $p < .001$  level; variables were residualized for age and sex and standardized prior to analysis.

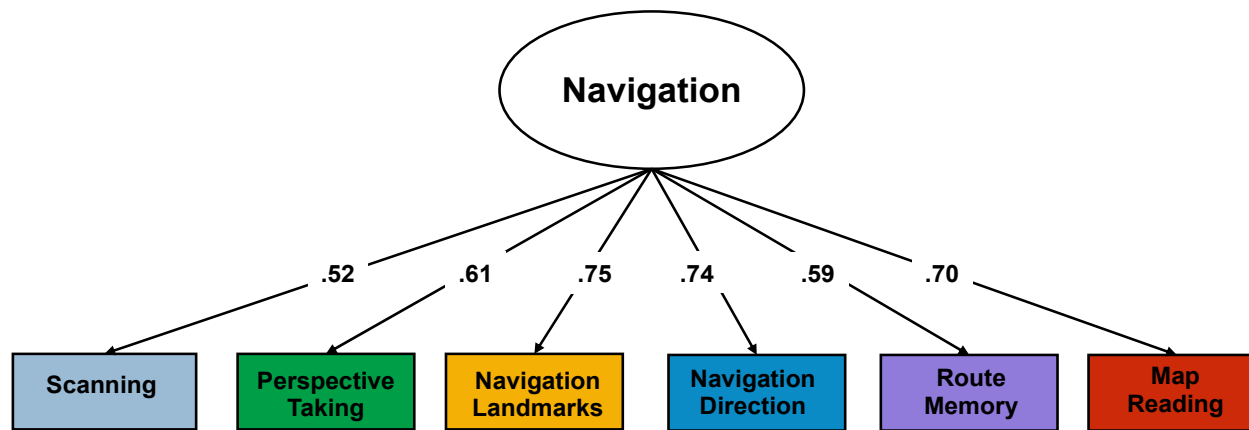

**Figure S11.** Factor structure of navigation abilities conducted examining the other half of the sample; CFI = 0.968, TLI = 0.947, RMSEA = 0.073, SRMR = 0.027.

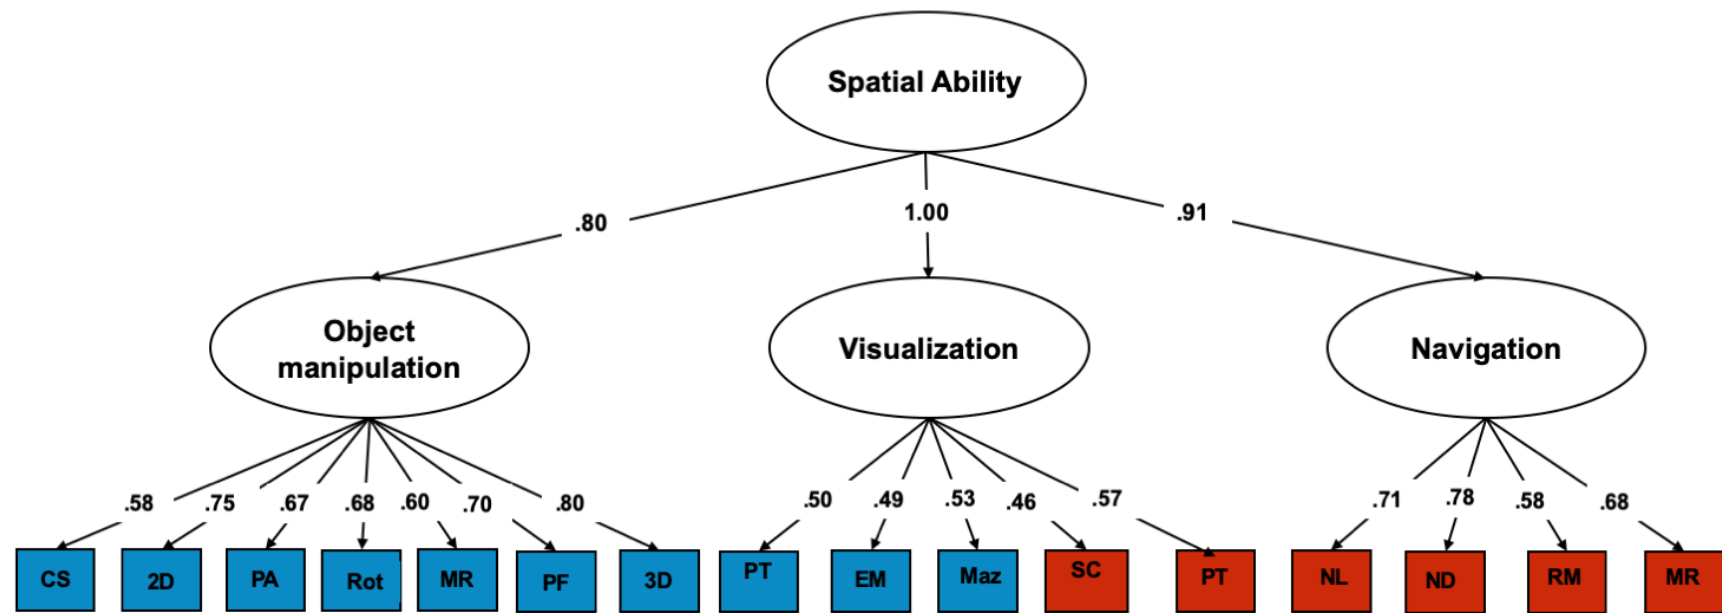

**Figure S12.** Hierarchical model of spatial abilities conducted in the other half of the sample; CFI = 0.939, TLI = 0.928, RMSEA = 0.046, SRMR = 0.050.
